# Supplementary material for: Two Types of Tet-On Transgenic Lines for Doxycycline-Inducible Gene Expression in Zebrafish Rod Photoreceptors and a Gateway-Based Tet-On Toolkit
Source: PubMed Central journal article supplement (PMC3520995; doi:10.1371/journal.pone.0051270), 2012-12-12
Supplement: pone.0051270.s001.pdf [file pone.0051270.s001.pdf]

# Figure S1. Vector construction details

| Vector name              | Lab # | Construction details                                                                                                                                                                                                                                                                                                                                                   |
|--------------------------|-------|------------------------------------------------------------------------------------------------------------------------------------------------------------------------------------------------------------------------------------------------------------------------------------------------------------------------------------------------------------------------|
| p5E-TRE                  | AJ4   | The XhoI fragment containing the TRE from pTRE-Tight was cloned into the Sall site of p5'E and then a 228 bp HindIII fragment was removed.                                                                                                                                                                                                                             |
| p5E-Xop                  | AJ17  | The XbaI fragment containing the minimal 0.8 Kb <i>Xenopus rhodopsin</i> promoter was cloned into the SpeI site of p5E-MCS.                                                                                                                                                                                                                                            |
| p5E-dA_MCS               | AJ21  | The Acc65I-XhoI fragment containing the SV40 poly dA signal from pG1.S2 was cloned into the Acc65I and XhoI sites of p5E-MCS-Mfe.                                                                                                                                                                                                                                      |
| p5E-dA_MCS-biTRE         | AJ22  | The EcoRI-SmaI fragment from pTRE-Tight-BI-AcGFP1 containing the biTRE was cloned into the AleI and MfeI sites of p5E-dA_MCS (AJ21).                                                                                                                                                                                                                                   |
| p5E-dA_EGFP-biTRE        | AJ24  | The XmaI-BamHI fragment containing EGFP from pENTR_EGFP2 was cloned into the BamHI and XmaI sites of p5E-dA_MCS-biTRE.                                                                                                                                                                                                                                                 |
| p5E-dA_nls-mCherry-biTRE | AJ25  | The nls-mCherry sequence from pME-nlsmCherry was amplified and cloned into pCRTopoII, allowing an EcoRV-SpeI fragment containing nls-mCherry to be cloned into the SmaI and SpeI sites of p5E-dA_MCS-biTRE (AJ22).                                                                                                                                                     |
| pL1L2-rtTA               | AJ3   | A BamHI-EcoRI piece containing the rtTA from pTet-On Advanced was cloned into the BamHI and EcoRI sites of pENTR_EGFP2. In order to remove an upstream Kozak sequence, an AgeI-SacI fragment was removed and the blunted vector was religated.                                                                                                                         |
| pL1L2-rtTA-HA            | AJ12  | Site directed mutagenesis was first performed on pL1L2-rtTA (AJ3) in order to insert a Sall site before the stop codon of rtTA. Then a double-stranded oligo encoding the HA epitope with appropriate overhangs was ligated into the site. Overhangs: HA Upper – tcgagtaccatcacgatgtccagattacgct and HA Lower – tcgacagcgtaatctggaacatcgtatgggta.                      |
| pL1L2-rtTA-FLAG          | AJ13  | Site directed mutagenesis was first performed on pL1L2-rtTA in order to insert a Sall site before the stop codon of rtTA. Then a double-stranded oligo encoding the FLAG epitope with appropriate overhangs was ligated into site. Overhangs: FLAG Upper – tcgaggactacaaggacgatcagcacaagg and FLAG Lower – tcgacctgtcgtcatcgtcctttagtcc.                               |
| pL1L2-biTRE              | AJ15  | A BamHI-EcoRI fragment of pTRE-Tight-BI-AcGFP1 containing just the biTRE tight sequence was cloned into the BamHI and EcoRI sites of pENTR EGFP2, which replaced EGFP.                                                                                                                                                                                                 |
| pToIDESTR4-R2pA_TRE:GFP  | AJ6   | A NotI, blunted fragment consisting of TRE followed by the mGFP and the SV40 polyadenylation signal was cut from an expression cassette in pG1.S2 and cloned into the EcoRV site of pToIDestR4-R2pA. This was then grown up in LB <sup>Amp<sup>r</sup>Chl</sup> and non-self-recombining clones were selected by performing a self-recombination test with LR Clonase. |
