# Supplementary material for: Two Types of Tet-On Transgenic Lines for Doxycycline-Inducible Gene Expression in Zebrafish Rod Photoreceptors and a Gateway-Based Tet-On Toolkit
Source: PubMed Central journal article supplement (PMC3520995; doi:10.1371/journal.pone.0051270), 2012-12-12
Supplement: pone.0051270.s002.pdf [file pone.0051270.s002.pdf]

**Figure S2.** Descriptions and diagrams of Tet-On Toolkit 5' entry vectors

| Vector name              | Lab # | 5' att | 3' att | Resistance genes | Cargo sequences                        | poly dA signal | ccdB/Chl | Comments                                                       | Diagram                                                                             |
|--------------------------|-------|--------|--------|------------------|----------------------------------------|----------------|----------|----------------------------------------------------------------|-------------------------------------------------------------------------------------|
| p5E-TRE                  | AJ4   | attL4  | attR1  | Kan              | TRE tight                              | No             | No       | enables three-way cloning of TRE constructs in pTolDestR4-R2pA |  |
| p5E-dA_MCS               | AJ21  | attL4  | attR1  | Kan              | poly dA signal                         | Yes            | No       | vector for cloning 5' of middle vector biTRE                   |  |
| p5E-dA_MCS-biTRE         | AJ22  | attL4  | attR1  | Kan              | poly dA biTRE                          | Yes            | No       | vector for cloning 5', bi-TRE controlled ORFs                  |  |
| p5E-dA_EGFP-biTRE        | AJ24  | attL4  | attR1  | Kan              | 3' -> 5' biTRE EGFP-dA cassette        | Yes            | No       | 'Backwards facing' EGFP expression cassette with biTRE         |  |
| p5E-dA_nls-mCherry-biTRE | AJ25  | attL4  | attR1  | Kan              | 3' -> 5' biTRE nls-mCherry-dA cassette | Yes            | No       | 'Backwards facing' nls-mCherry expression cassette with biTRE  |  |
