# Supplementary material for: Two Types of Tet-On Transgenic Lines for Doxycycline-Inducible Gene Expression in Zebrafish Rod Photoreceptors and a Gateway-Based Tet-On Toolkit
Source: PubMed Central journal article supplement (PMC3520995; doi:10.1371/journal.pone.0051270), 2012-12-12
Supplement: pone.0051270.s003.pdf [file pone.0051270.s003.pdf]

**Figure S3.** Descriptions and diagrams of Tet-On Toolkit middle entry vectors

| Vector name      | Lab # | 5' att | 3' att | Resistance gene | Cargo sequences           | poly dA signal | ccdB/Chl | Comments                                                                | Diagram                                                                             |
|------------------|-------|--------|--------|-----------------|---------------------------|----------------|----------|-------------------------------------------------------------------------|-------------------------------------------------------------------------------------|
| pL1L2-rtTA       | AJ3   | attL1  | attL2  | Kan             | rtTA                      | No             | No       | transactivator entry vector for Tet-On driver constructs                |  |
| pL1L2-rtTA-HA    | AJ12  | attL1  | attL2  | Kan             | rtTA with c-term HA tag   | No             | No       | HA-tagged rtTA for Tet-On driver constructs                             |  |
| pL1L2M-rtTA-FLAG | AJ13  | attL1  | attL2  | Kan             | rtTA with c-term FLAG tag | No             | No       | FLAG-tagged rtTA for Tet-On driver constructs                           |  |
| pL1L2-biTRE      | AJ15  | attL1  | attL2  | Kan             | bi-TRE                    | No             | No       | enables four-way recombination of biTRE constructs into pTolDestR4-R3pA |  |
