# Supplementary material for: Two Types of Tet-On Transgenic Lines for Doxycycline-Inducible Gene Expression in Zebrafish Rod Photoreceptors and a Gateway-Based Tet-On Toolkit
Source: PubMed Central journal article supplement (PMC3520995; doi:10.1371/journal.pone.0051270), 2012-12-12

**Figure S4.** Description and diagram of 3-way destination vector for self-detecting driver

| Vector name             | Lab # | 5' att | 3' att | Resistance genes | Cargo sequences                                                    | poly dA signal | ccdB/Chl | Comments                                               |
|-------------------------|-------|--------|--------|------------------|--------------------------------------------------------------------|----------------|----------|--------------------------------------------------------|
| pTolDestR4-R2pA_TRE:GFP | AJ6   | attR2  | attR4  | Amp & Chl        | TRE:GFP_dA sequence + trimmed ccdB/Chl to be lost on recombination | Yes            | Yes      | Tol2 backbone to make self-detecting Tet-On constructs |

**Diagram**

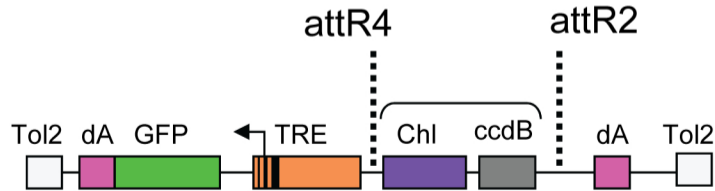

Supplement: pone.0051270.s004.pdf [file pone.0051270.s004.pdf]
