# Supplementary material for: Two Types of Tet-On Transgenic Lines for Doxycycline-Inducible Gene Expression in Zebrafish Rod Photoreceptors and a Gateway-Based Tet-On Toolkit
Source: PubMed Central journal article supplement (PMC3520995; doi:10.1371/journal.pone.0051270), 2012-12-12

**Figure S5.** Possible Tet-On response vector conformations to use with self-detecting driver

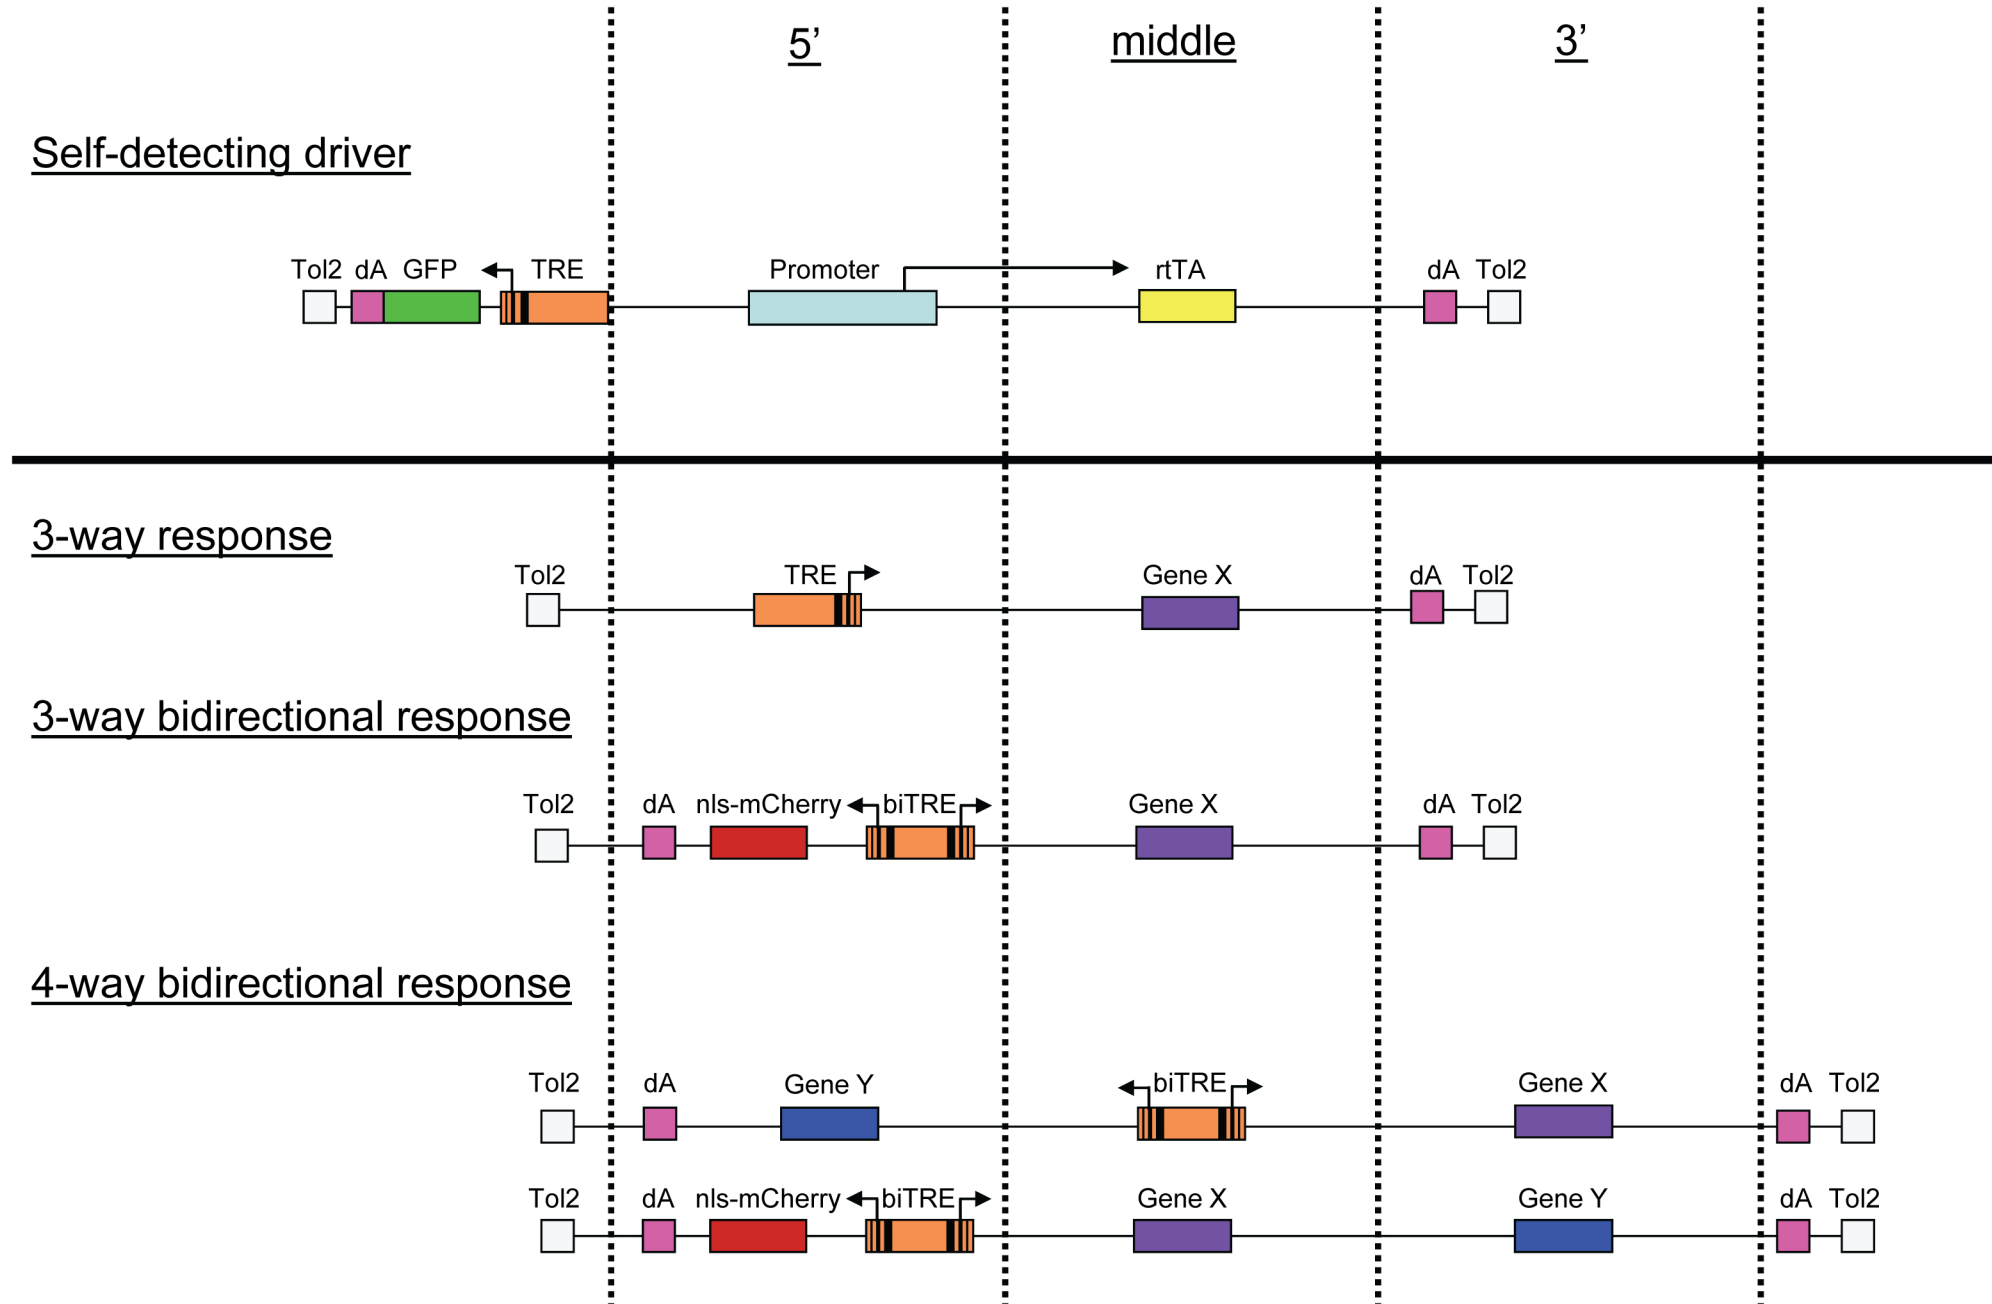

Supplement: pone.0051270.s005.pdf [file pone.0051270.s005.pdf]
