# Supplementary material for: Two Types of Tet-On Transgenic Lines for Doxycycline-Inducible Gene Expression in Zebrafish Rod Photoreceptors and a Gateway-Based Tet-On Toolkit
Source: PubMed Central journal article supplement (PMC3520995; doi:10.1371/journal.pone.0051270), 2012-12-12
Supplement: pone.0051270.s007.pdf [file pone.0051270.s007.pdf]

**Figure S7. Vector components for three-way recombination assembly of constructs**

| Construct                                                                                       | 5' clone                    | Middle clone                    | DEST vector                      |
|-------------------------------------------------------------------------------------------------|-----------------------------|---------------------------------|----------------------------------|
| <i>Xla.rho:rtTA, TRE:GFP</i><br>(self-reporting, rod-specific Tet-On driver)                    | p5E-Xop<br>(AJ17)           | pL1L2-rtTA<br>(AJ3)             | pToIDestR4-R2pA_TRE:GFP<br>(AJ6) |
| <i>Xla.rho:rtTA<sup>flag</sup></i><br>(tagged, rod-specific Tet-On driver)                      | p5E-Xop<br>(AJ17)           | pL1L2-rtTA-FLAG<br>(AJ13)       | pToIDestR4-R2pA<br>(NL465)       |
| <i>TRE:nls-mCherry</i><br>(nuclear mCherry Tet-On response)                                     | p5E-TRE<br>(AJ4)            | pME-nlsmCherry<br>(CBC223)      | pToIDestR4-R2pA<br>(NL465)       |
| <i>biTRE:EGFP, nls-mCherry</i><br>(bidirectional EGFP and nuclear mCherry Tet-On response)      | p5E-dA_EGFP-biTRE<br>(AJ24) | pME-nlsmCherry<br>(CBC223)      | pToIDestR4-R2pA<br>(NL465)       |
| <i>TRE:HA-Crb2a<sup>IntraWT</sup></i><br>(HA-tagged Crb2a intracellular domain Tet-On response) | p5E-TRE<br>(AJ4)            | pME-HA-Crb2a <sup>IntraWT</sup> | pToIDestR4-R2pA<br>(NL465)       |
